# Supplementary material
Source: Springer Nature journal article supplement (https://www.springermedizin.de/resource/supplementary/12947_2012_442_MOESM1_ESM.pdf/9555780)
Supplement: MOESM1 [file 9555780]

# ① Lung ultrasound

**Bilateral  
A-lines**

**Focal multiple  
B-lines**

**Diffuse multiple bilateral  
B-lines**

- Bronchial asthma
- Chronic obstructive pulmonary disease (COPD)

**Non-cardiogenic  
acute dyspnea**

- Pneumonia and pneumonitis
- Atelectasis
- Pulmonary infarction
- Pulmonary contusion
- Pleural disease
- Neoplasia

**Non-cardiogenic  
acute dyspnea**

- Pulmonary edema of various causes
- Interstitial pneumonia/pneumonitis
- Pulmonary fibrosis
- Acute respiratory distress syndrome (ARDS)

## ② Cardiac ultrasound

**LVEF  $\geq 40\%$   
(preserved EF)**

**LVEF  $< 40\%$   
(reduced EF)**

**MR :**

**moderate to severe ?**

**MR or TR:**

**moderate to severe ?**

## ③ IVC ultrasound

**Collapsibility  $< 50\%$  ?**

**Non-cardiogenic  
acute dyspnea**

**Cardiogenic  
acute dyspnea**
